# Supplementary material
Source: PubMed Central journal article supplement (PMC4234715)
Supplement: supp_140387_change-tobe-1-at.pdf [file supp_140387_change-tobe-1-at.pdf]

**Appendix 1 (as supplied by the authors): 2014 C-CHANGE Guidelines\* and updated References**

| <b>Table 1. Body Habitus</b>                                                                                                                                                                                                                                                                                                                                                    |              |
|---------------------------------------------------------------------------------------------------------------------------------------------------------------------------------------------------------------------------------------------------------------------------------------------------------------------------------------------------------------------------------|--------------|
| <b>All</b>                                                                                                                                                                                                                                                                                                                                                                      |              |
| Height, weight and waist circumference should be measured and body mass index calculated for all adults.                                                                                                                                                                                                                                                                        | Obesity [1]  |
| Maintenance of a healthy body weight (body mass index 18.5 to 24.9 kg/m <sup>2</sup> , and waist circumference less than 102 cm for men and less than 88 cm for women) is recommended for nonhypertensive individuals to prevent hypertension and for hypertensive patients to reduce blood pressure. All overweight hypertensive individuals should be advised to lose weight. | CHEP [2]     |
| <b>Overweight/obesity</b>                                                                                                                                                                                                                                                                                                                                                       |              |
| History and a general physical examination to exclude secondary (endocrine or syndrome-related) causes of overweight/obesity and overweight/obesity related health risks and complications.                                                                                                                                                                                     | Obesity [1]  |
| Measuring body mass index (BMI = weight[kg]/height[m] <sup>2</sup> ) in children aged two to seventeen years                                                                                                                                                                                                                                                                    | Obesity* [3] |

| <b>Table 2. Diet, sodium and alcohol intake</b>                                                                                                                                                                                                                                                                                                                                                                                                                                                                                                                                                                                                |             |
|------------------------------------------------------------------------------------------------------------------------------------------------------------------------------------------------------------------------------------------------------------------------------------------------------------------------------------------------------------------------------------------------------------------------------------------------------------------------------------------------------------------------------------------------------------------------------------------------------------------------------------------------|-------------|
| <b>All</b>                                                                                                                                                                                                                                                                                                                                                                                                                                                                                                                                                                                                                                     |             |
| Two or fewer standard drinks per day; fewer than 14 drinks per week for men; fewer than 9 drinks per week for women.                                                                                                                                                                                                                                                                                                                                                                                                                                                                                                                           | CHEP [2]    |
| To decrease blood pressure, consider reducing sodium intake towards 2,000 mg (5g of salt) per day.                                                                                                                                                                                                                                                                                                                                                                                                                                                                                                                                             | CHEP* [2]   |
| All individuals should be encouraged to adopt healthy eating habits to lower their CVD risk: (1) moderate energy (caloric) intake to achieve and maintain a healthy body weight; (2) emphasize a diet rich in vegetables, fruit, whole-grain cereals, and polyunsaturated and monounsaturated oils, including omega-3 fatty acids particularly from fish; (3) avoid trans fats, limit saturated and total fats to < 7% and <30% of daily total energy (caloric) intake, respectively; (4) increase daily fibre intake to >30 g; (5) limit cholesterol intake to 200 mg daily for individuals with dyslipidemia or at increased CVD risk. [4;5] | CCS* [6]    |
| <b>Diabetes</b>                                                                                                                                                                                                                                                                                                                                                                                                                                                                                                                                                                                                                                |             |
| People with diabetes should be offered timely diabetes education that is tailored to enhance self-care practices and behaviours.[7-9]                                                                                                                                                                                                                                                                                                                                                                                                                                                                                                          | CDA* [10]   |
| <b>Overweight/Obesity</b>                                                                                                                                                                                                                                                                                                                                                                                                                                                                                                                                                                                                                      |             |
| An optimal dietary plan for achieving healthy body weight                                                                                                                                                                                                                                                                                                                                                                                                                                                                                                                                                                                      | Obesity [1] |

|                                                                                                                                                                                                             |             |
|-------------------------------------------------------------------------------------------------------------------------------------------------------------------------------------------------------------|-------------|
| and dietary counseling for adults should be developed with a qualified and experienced health professional (preferably a registered dietitian) together with the individual and family to meet their needs. |             |
| A comprehensive healthy lifestyle intervention is recommended for overweight and obese people.                                                                                                              | Obesity [1] |

| <b>Table 3. Risk Factor Screening</b>                                                                                                                                                                                                                                                                                                                                                                                                                                                                                                                                                                                                                                                                                                                                                                                                                                                                                                                                                                                                                                                                                                                                                                                                                                                                       |           |
|-------------------------------------------------------------------------------------------------------------------------------------------------------------------------------------------------------------------------------------------------------------------------------------------------------------------------------------------------------------------------------------------------------------------------------------------------------------------------------------------------------------------------------------------------------------------------------------------------------------------------------------------------------------------------------------------------------------------------------------------------------------------------------------------------------------------------------------------------------------------------------------------------------------------------------------------------------------------------------------------------------------------------------------------------------------------------------------------------------------------------------------------------------------------------------------------------------------------------------------------------------------------------------------------------------------|-----------|
| <b>All</b>                                                                                                                                                                                                                                                                                                                                                                                                                                                                                                                                                                                                                                                                                                                                                                                                                                                                                                                                                                                                                                                                                                                                                                                                                                                                                                  |           |
| All individuals should be evaluated annually for type 2 diabetes risk on the basis of demographic and clinical criteria.                                                                                                                                                                                                                                                                                                                                                                                                                                                                                                                                                                                                                                                                                                                                                                                                                                                                                                                                                                                                                                                                                                                                                                                    | CDA7 [11] |
| <p>Screening for diabetes using FPG and/or A1C should be performed every 3 years in individuals <math>\geq 40</math> years of age or at high risk using a risk calculator. More frequent and/or earlier testing with either FPG and/or A1C or 2hPG in a 75 g OGTT should be considered in those at very high risk using a risk calculator or in people with additional risk factors for diabetes. These risk factors include:</p> <ul style="list-style-type: none"> <li>○ First-degree relative with type 2 diabetes;</li> <li>○ Member of high-risk population (e.g. Aboriginal, African, Asian; Hispanic or South Asian descent);</li> <li>○ History of prediabetes (IGT, IFG, or A1C 6.0%-6.4%); History of gestational diabetes mellitus;</li> <li>○ History of delivery of a macrosomic infant;</li> <li>○ Presence of vascular risk factors (low HDL <math>&lt; 1.0</math> mmol/L in males, <math>&lt; 1.3</math> mmol/L in females, high triglycerides <math>\geq 1.7</math> mmol/L, hypertension, overweight/obesity);</li> <li>○ Presence of associated diseases (polycystic ovary syndrome, acanthosis nigricans, obstructive sleep apnoea, psychiatric disorders, HIV infection);</li> <li>○ Use of drugs associated with diabetes (glucocorticoids, atypical antipsychotics, HAART)</li> </ul> | CDA* [11] |
| Testing with 2hPG in a 75 g OGTT should be undertaken in individuals with FPG 6.1 - 6.9 mmol/L and/or A1C 6.0% - 6.4% in order to identify individuals with IGT or diabetes                                                                                                                                                                                                                                                                                                                                                                                                                                                                                                                                                                                                                                                                                                                                                                                                                                                                                                                                                                                                                                                                                                                                 | CDA* [11] |
| Testing with 2hPG in a 75 g OGTT may be undertaken in individuals with FPG 5.6 - 6.0 mmol/L and/or A1C 5.5% - 5.9% and $\geq 1$ risk factor(s) in order to identify individuals with IGT or diabetes.                                                                                                                                                                                                                                                                                                                                                                                                                                                                                                                                                                                                                                                                                                                                                                                                                                                                                                                                                                                                                                                                                                       | CDA [11]  |
| Health care professionals who have been specifically trained to measure blood pressure (BP) accurately should assess BP in all adult patients at all appropriate visits to determine cardiovascular risk and monitor antihypertensive treatment.                                                                                                                                                                                                                                                                                                                                                                                                                                                                                                                                                                                                                                                                                                                                                                                                                                                                                                                                                                                                                                                            | CHEP [2]  |
| Screening of plasma lipids is recommended in adult men $\geq$                                                                                                                                                                                                                                                                                                                                                                                                                                                                                                                                                                                                                                                                                                                                                                                                                                                                                                                                                                                                                                                                                                                                                                                                                                               | CCS* [6]  |

|                                                                                                                                                                                                                                                                                                                                                                                                                                                                                                                                                                  |             |
|------------------------------------------------------------------------------------------------------------------------------------------------------------------------------------------------------------------------------------------------------------------------------------------------------------------------------------------------------------------------------------------------------------------------------------------------------------------------------------------------------------------------------------------------------------------|-------------|
| 40 and women $\geq$ 50 years of age or postmenopausal. Screen lipids at any age for: smoking, diabetes, hypertension, overweight, rheumatoid arthritis, systemic lupus erythematosus, psoriatic arthritis, ankylosing spondylitis, inflammatory bowel disease, chronic obstructive pulmonary disease, chronic HIV infection, CKD, abdominal aneurysm and erectile dysfunction. Consider screening individuals of First Nations or South Asian ancestry at an earlier age. [12-17]                                                                                |             |
| All patients/clients should be asked if they use tobacco and should have their tobacco use status documented on a regular basis. All physicians, nurses and other health care workers should strongly advise all patients who smoke to quit and provide brief advice.                                                                                                                                                                                                                                                                                            | CCAR [4]    |
| <b>Stroke</b>                                                                                                                                                                                                                                                                                                                                                                                                                                                                                                                                                    |             |
| Persons at risk of stroke and patients who have had a stroke should be assessed for vascular disease risk factors and lifestyle management issues (diet, sodium intake, exercise, weight, and alcohol intake, and use of oral contraceptives and hormone replacement therapy). They should receive information and counseling about possible strategies to modify their lifestyle and risk factors. Referrals to appropriate specialists should be made where required to provide more comprehensive assessments and structured programs to manage risk factors. | Stroke [18] |
| <b>Diabetes</b>                                                                                                                                                                                                                                                                                                                                                                                                                                                                                                                                                  |             |
| In people with diabetes a baseline resting ECG should be performed in individuals with any of the following: <ul style="list-style-type: none"> <li>○ Age &gt; 40 years,</li> <li>○ Duration of diabetes &gt; 15 years and older than 30 years</li> <li>○ End organ damage (micro or macrovascular)</li> <li>○ Other cardiac risk factors.</li> </ul> Repeat resting ECG every 2 years.                                                                                                                                                                          | CDA* [19]   |
| <b>Overweight/Obesity</b>                                                                                                                                                                                                                                                                                                                                                                                                                                                                                                                                        |             |
| Screening for eating disorders, depression and psychiatric disorders, as appropriate.                                                                                                                                                                                                                                                                                                                                                                                                                                                                            | Obesity [1] |

|                                                                                                                                                                                                                                                                                     |          |
|-------------------------------------------------------------------------------------------------------------------------------------------------------------------------------------------------------------------------------------------------------------------------------------|----------|
| <b>Table 4. Diagnostic Strategies</b>                                                                                                                                                                                                                                               |          |
| <b>Diabetes</b>                                                                                                                                                                                                                                                                     |          |
| <ul style="list-style-type: none"> <li>○ Diabetes should be diagnosed by any of the following criteria: <ul style="list-style-type: none"> <li>○ FPG <math>\geq</math> 7.0 mmol/L</li> <li>○ A1C <math>\geq</math> 6.5% (for use in adults in the absence of</li> </ul> </li> </ul> | CDA [20] |

|                                                                                                                                                                                                                                                                                                                                                                                                                       |             |
|-----------------------------------------------------------------------------------------------------------------------------------------------------------------------------------------------------------------------------------------------------------------------------------------------------------------------------------------------------------------------------------------------------------------------|-------------|
| <p>factors that affect the accuracy of A1C and not for use in those with suspected type 1 diabetes)</p> <ul style="list-style-type: none"> <li>○ 2hPG in a 75 g OGTT <math>\geq</math>11.1 mmol/L</li> <li>○ Random PG <math>\geq</math>11.1 mmol/L</li> </ul>                                                                                                                                                        |             |
| <b>Hypertension</b>                                                                                                                                                                                                                                                                                                                                                                                                   |             |
| Routine laboratory tests that should be performed for the investigation of all patients with hypertension include: urinalysis; blood chemistry (potassium, sodium and creatinine); fasting blood glucose and/or glycated hemoglobin (A1C); fasting serum total cholesterol and high density lipoprotein cholesterol, low density lipoprotein cholesterol and triglycerides; and standard 12-lead electrocardiography. | CHEP* [2]   |
| Patients with hypertension and evidence of heart failure should have an objective assessment of left ventricular ejection fraction, either by echocardiogram or nuclear imaging.                                                                                                                                                                                                                                      | CHEP [2]    |
| The use of home blood pressure monitoring on a regular basis should be considered for patients with hypertension, particularly those with: diabetes mellitus; chronic kidney disease; suspected nonadherence; demonstrated white coat effect; and blood pressure controlled in the office but not at home (masked hypertension).                                                                                      | CHEP [2]    |
| <b>Overweight/Obesity</b>                                                                                                                                                                                                                                                                                                                                                                                             |             |
| Additional investigations, such as liver enzyme tests, urinalysis and sleep studies (when appropriate), to screen for and exclude other common overweight/obesity-related health problems.                                                                                                                                                                                                                            | Obesity [1] |

|                                                                                                                                                                                                                                                                                                                                                                                                                                                                                                                                                                                                                                         |          |
|-----------------------------------------------------------------------------------------------------------------------------------------------------------------------------------------------------------------------------------------------------------------------------------------------------------------------------------------------------------------------------------------------------------------------------------------------------------------------------------------------------------------------------------------------------------------------------------------------------------------------------------------|----------|
| <b>Table 5. Risk Stratification</b>                                                                                                                                                                                                                                                                                                                                                                                                                                                                                                                                                                                                     |          |
| <b>All</b>                                                                                                                                                                                                                                                                                                                                                                                                                                                                                                                                                                                                                              |          |
| We recommend that a cardiovascular risk assessment, using the “10-Year Risk” provided by the Framingham model be completed every 3-5 years for men age 40-75, and women age 50-75 years. This should be modified (percent risk doubled) when family history of premature CVD is positive (i.e, first-degree relative < 55 years for men and < 65 years of age for women). A risk assessment might also be completed whenever a patient’s expected risk status changes. Younger individuals with at least 1 risk factor for premature CVD might also benefit from a risk assessment to motivate them to improve their lifestyle. [21-28] | CCS* [6] |
| We recommend calculating and discussing a patient’s “Cardiovascular Age” to improve the likelihood that patients will reach lipid targets and that poorly controlled                                                                                                                                                                                                                                                                                                                                                                                                                                                                    | CCS* [6] |

|                                                                                                                                                                                                                                                                                                                                                                                         |          |
|-----------------------------------------------------------------------------------------------------------------------------------------------------------------------------------------------------------------------------------------------------------------------------------------------------------------------------------------------------------------------------------------|----------|
| hypertension will be treated [25]                                                                                                                                                                                                                                                                                                                                                       |          |
| <b>Dyslipidemia</b>                                                                                                                                                                                                                                                                                                                                                                     |          |
| We recommend that high risk be defined in subjects who have clinical atherosclerosis, abdominal aortic aneurysm, or an adjusted FRS of $\geq 20\%$ . We have also included diabetes of $> 15$ years duration and age older than 30 years, diabetes with age older than 40 years, or the presence of microvascular disease, high risk kidney disease, or high risk hypertension. [29-35] | CCS* [6] |
| We recommend that the IR category include individuals with adjusted FRS $\geq 10\%$ and $< 20\%$ . [33;36-47]                                                                                                                                                                                                                                                                           | CCS* [6] |

|                                                                                                                                                                                                                                                                                             |             |
|---------------------------------------------------------------------------------------------------------------------------------------------------------------------------------------------------------------------------------------------------------------------------------------------|-------------|
| <b>Table 6. Treatment targets</b>                                                                                                                                                                                                                                                           |             |
| <b>All</b>                                                                                                                                                                                                                                                                                  |             |
| All those considering initiating a vigorous exercise program are encouraged to consult their physician or health care team professionals                                                                                                                                                    | Obesity [1] |
| Long-term, regular physical activity is suggested, which is associated with maintenance of body weight or a modest reduction in body weight for all overweight and obese people.                                                                                                            | Obesity [1] |
| Physical activity and exercise should be sustainable and tailored to the individual. The total duration should be increased gradually to maximize the weight-loss benefits.                                                                                                                 | Obesity [1] |
| To achieve health benefits, adults aged 18–64 years should accumulate at least 150 min of moderate-to-vigorous-intensity aerobic physical activity per week, in bouts of 10 min or more.                                                                                                    | CSEP [3]    |
| It is also beneficial to add muscle- and bone-strengthening activities that use major muscle groups, at least two days per week.                                                                                                                                                            | CSEP [3]    |
| More physical activity provides greater health benefits                                                                                                                                                                                                                                     | CSEP [3]    |
| <b>Stroke</b>                                                                                                                                                                                                                                                                               |             |
| Following the acute phase of a stroke, BP lowering treatment is recommended to a target of consistently $< 140/90$ mmHg                                                                                                                                                                     | CHEP [2]    |
| <b>Dyslipidemia</b>                                                                                                                                                                                                                                                                         |             |
| We recommend a target LDL-C $\leq 2.0$ mmol/L or $\geq 50\%$ reduction of LDL-C for high risk individuals in whom treatment is initiated. We recommend that apo B $\leq 0.80$ g/L or non-HDL-C $\leq 2.6$ mmol/L be considered as alternative treatment targets for optimal risk reduction. | CCS* [6]    |
| In Intermediate risk individuals with LDL-C $\geq 3.5$ mmol/L, apo B $\geq 1.2$ g/L, or non-HDL-C $\geq 4.3$ mmol/L is suggested                                                                                                                                                            | CCS* [6]    |

|                                                                                                                                                                                                                                                                                                                                                                                                                                                                                                                                                                                                                                                                                              |           |
|----------------------------------------------------------------------------------------------------------------------------------------------------------------------------------------------------------------------------------------------------------------------------------------------------------------------------------------------------------------------------------------------------------------------------------------------------------------------------------------------------------------------------------------------------------------------------------------------------------------------------------------------------------------------------------------------|-----------|
| <p>to identify patients who might benefit from pharmacotherapy. We recommend a target LDL-C <math>\leq</math> 2.0 mmol/L or <math>\geq</math> 50% reduction of LDL-C for intermediate risk individuals in whom treatment is initiated. Alternative target variables are apo B <math>\leq</math> 0.8 g/L or non-HDL-C <math>\leq</math> 2.6 mmol/L</p>                                                                                                                                                                                                                                                                                                                                        |           |
| <b>Diabetes</b>                                                                                                                                                                                                                                                                                                                                                                                                                                                                                                                                                                                                                                                                              |           |
| <p>All individuals with diabetes (type 1 or type 2) should follow a comprehensive, multifaceted approach to reduce cardiovascular risk in the majority of adult patients, including: Achievement and maintenance of healthy body weight; Healthy diet; Regular physical activity; Smoking cessation; Optimal glycemic control (usually A1C <math>\leq</math> 7%); Optimal blood pressure control (&lt;130/80 mm Hg); Additional vascular protective medications.</p>                                                                                                                                                                                                                         | CDA [48]  |
| <p>Therapy in most individuals with type 1 or type 2 diabetes should be targeted to achieve an A1C <math>\leq</math>7.0% in order to reduce the risk of microvascular and, if implemented early in the course of disease, macrovascular complications. [49;50]</p>                                                                                                                                                                                                                                                                                                                                                                                                                           | CDA [51]  |
| <p>An A1C <math>\leq</math> 6.5% may be targeted in some patients with type 2 diabetes to further lower the risk of nephropathy and retinopathy, but this must be balanced against the risk of hypoglycemia.[52;53]</p>                                                                                                                                                                                                                                                                                                                                                                                                                                                                      | CDA [51]  |
| <p>Less stringent A1C targets (7.1%-8.5% in most cases) may be appropriate in patients with type 1 or type 2 diabetes with any of the following:</p> <ol style="list-style-type: none"> <li>Limited life expectancy</li> <li>High level of functional dependency</li> <li>Extensive coronary artery disease at high risk of ischemic events</li> <li>Multiple comorbidities</li> <li>History of recurrent severe hypoglycemia</li> <li>Hypoglycemia unawareness</li> <li>Longstanding diabetes for whom it is difficult to achieve an A1C <math>\leq</math> 7.0% despite effective doses of multiple antihyperglycemic agents, including intensified basal-bolus insulin therapy.</li> </ol> | CDA* [51] |
| <p>An intensive lifestyle intervention program combining dietary modification and increased physical activity may be used to achieve weight loss and improvements in glycemic control and cardiovascular risk factors.[54]</p>                                                                                                                                                                                                                                                                                                                                                                                                                                                               | CDA* [55] |
| <b>Hypertension</b>                                                                                                                                                                                                                                                                                                                                                                                                                                                                                                                                                                                                                                                                          |           |
| <p>Antihypertensive therapy should be strongly considered if systolic blood pressure readings average 140 mm Hg or higher in the presence of macrovascular target organ damage.</p>                                                                                                                                                                                                                                                                                                                                                                                                                                                                                                          | CHEP [2]  |
| <p>Persons with diabetes mellitus should be treated to attain</p>                                                                                                                                                                                                                                                                                                                                                                                                                                                                                                                                                                                                                            | CHEP/CDA  |

|                                                                                                                                                                                                                               |             |
|-------------------------------------------------------------------------------------------------------------------------------------------------------------------------------------------------------------------------------|-------------|
| systolic blood pressures of less than 130 mm Hg and diastolic blood pressures of less than 80 mm Hg. (These target blood pressure levels are the same as the blood pressure treatment thresholds.)                            | [2;56]      |
| Antihypertensive therapy should be strongly considered if diastolic blood pressure readings average 90 mm Hg or higher in the presence of macrovascular target organ damage or other independent cardiovascular risk factors. | CHEP [2]    |
| In the very elderly (age 80 years and older), who do not have diabetes or target organ damage, the SBP threshold for initiating drug therapy is $\geq 160$ mm Hg and the SBP target is $< 150$ mm Hg.[57]                     | CHEP* [2]   |
| <b>Overweight/Obesity</b>                                                                                                                                                                                                     |             |
| The initial weight loss goal in obese individuals should be 5% to 10% of baseline body weight.                                                                                                                                | Obesity [1] |

|                                                                                                                                                                                                                                                                                                  |             |
|--------------------------------------------------------------------------------------------------------------------------------------------------------------------------------------------------------------------------------------------------------------------------------------------------|-------------|
| <b>Table 7. Pharmacologic and or procedural therapy</b>                                                                                                                                                                                                                                          |             |
| <b>Stroke</b>                                                                                                                                                                                                                                                                                    |             |
| For patients with stroke treatment with an ACE inhibitor and thiazide/thiazide-like diuretic combination is preferred The combination of an ACE inhibitor and ARB is not recommended.                                                                                                            | CHEP [2]    |
| Strong consideration should be given to the initiation of antihypertensive therapy after the acute phase of a stroke or transient ischemic attack.                                                                                                                                               | CHEP [2]    |
| Antiplatelet therapy: all patients with ischemic stroke or transient ischemic attack should be prescribed antiplatelet therapy for secondary prevention of recurrent stroke unless there is an indication for anticoagulation.                                                                   | Stroke [18] |
| ASA (81mg), combined ASA (25 mg) and extended-release dipyridamole (200 mg), or clopidogrel (75 mg) are all appropriate options and selection should depend on the clinical circumstances.                                                                                                       | Stroke [18] |
| For the secondary prevention of stroke, patients with atrial fibrillation who have had a stroke/TIA should be treated with Oral Anticoagulation therapy.                                                                                                                                         | Stroke [18] |
| <b>Coronary Artery Disease/Ischaemic Heart Disease</b>                                                                                                                                                                                                                                           |             |
| Patients with documented coronary artery disease, in the absence of specific contraindications or documented intolerance, should be treated with anti-platelet agents; for patients with a history of chronic stable angina, remote PCI, or CABG, ASA (75 mg PO to 162 mg) PO daily indefinitely | CACR [4]    |
| Cardiac rehabilitation programs and services are                                                                                                                                                                                                                                                 | CACR [4]    |

|                                                                                                                                                                                                                                                                                                                                                                                                                                                                                                                                  |                 |
|----------------------------------------------------------------------------------------------------------------------------------------------------------------------------------------------------------------------------------------------------------------------------------------------------------------------------------------------------------------------------------------------------------------------------------------------------------------------------------------------------------------------------------|-----------------|
| recommended for most, and potentially all, patients with documented cardiovascular disease.                                                                                                                                                                                                                                                                                                                                                                                                                                      |                 |
| <b>Diabetes</b>                                                                                                                                                                                                                                                                                                                                                                                                                                                                                                                  |                 |
| Beta blockers should be prescribed when indicated for systolic heart failure, as they provide similar benefits in people with diabetes compared with people without diabetes                                                                                                                                                                                                                                                                                                                                                     | CDA [58]        |
| Statin therapy should be used to reduce cardiovascular risk in adults with type 1 or type 2 diabetes with any of the following features: <ul style="list-style-type: none"> <li>a. Clinical macrovascular disease;</li> <li>b. Age <math>\geq</math>40 years;</li> <li>c. Age &lt;40 years and 1 of the following: diabetes duration &gt;15 years and age &gt;30 years, microvascular complications</li> </ul>                                                                                                                   | CDA * [48]      |
| ACE inhibitor or ARB, at doses that have demonstrated vascular protection, should be used to reduce cardiovascular risk in adults with type 1 or type 2 diabetes with any of the following: a. Clinical macrovascular disease, b. Age $\geq$ 55 years, c. Age < 55 years and microvascular complications.[6;59-61]                                                                                                                                                                                                               | CDA * [48]      |
| For persons with diabetes and hypertension not included in the above recommendation, appropriate choices include (in alphabetical order): ACE inhibitors, angiotensin receptor blockers, dihydropyridine CCBs and thiazide/thiazide-like diuretics. If target blood pressures are not achieved with standard-dose monotherapy, additional antihypertensive therapy should be used. For people in whom combination therapy with an ACE inhibitor is being considered, a dihydropyridine CCB is preferable to hydrochlorothiazide. | CHEP/CDA [2;56] |
| <b>Hypertension</b>                                                                                                                                                                                                                                                                                                                                                                                                                                                                                                              |                 |
| Initial therapy should consist of monotherapy with a thiazide diuretic; a $\beta$ -blocker (in patients younger than 60 years); an ACE inhibitor (in nonblack patients); a long-acting CCB; or an ARB. If there are adverse effects, another drug from this group should be substituted. Hypokalemia should be avoided in patients treated with thiazide diuretic monotherapy.                                                                                                                                                   | CHEP [2]        |
| Combination therapy using two first-line agents may also be considered as initial treatment of hypertension if systolic blood pressure is 20 mm Hg above target or if diastolic blood pressure is 10 mm Hg above target.                                                                                                                                                                                                                                                                                                         | CHEP [2]        |
| Additional antihypertensive drugs should be used if target blood pressure levels are not achieved with standard dose monotherapy. Add-on drugs should be chosen from first line                                                                                                                                                                                                                                                                                                                                                  | CHEP [2]        |

|                                                                                                                                                                                                                                                                                                                                                                                                                 |             |
|-----------------------------------------------------------------------------------------------------------------------------------------------------------------------------------------------------------------------------------------------------------------------------------------------------------------------------------------------------------------------------------------------------------------|-------------|
| choices. Useful choices include a thiazide diuretic or CCB with an ACE inhibitor, ARB or a $\beta$ -blocker. Caution should be exercised in combining a nondihydropyridine CCB and a $\beta$ -blocker. The combination of an ACE inhibitor and ARB is not recommended.                                                                                                                                          |             |
| $\alpha$ -Blockers are not recommended as first-line agents for uncomplicated hypertension.                                                                                                                                                                                                                                                                                                                     | CHEP [2]    |
| Thiazide diuretics are recommended as additive antihypertensive therapy. For patients with chronic kidney disease and volume overload, loop diuretics are an alternative.                                                                                                                                                                                                                                       | CHEP [2]    |
| For persons with cardiovascular or kidney disease, including microalbuminuria or with cardiovascular risk factors in addition to diabetes and hypertension, an ACE inhibitor or an ARB is recommended as initial therapy.                                                                                                                                                                                       | CHEP [2]    |
| In patients with systolic dysfunction, an ARB is recommended if ACE inhibitors are not tolerated.                                                                                                                                                                                                                                                                                                               | CHEP [2]    |
| For hypertensive patients with heart failure whose blood pressure is not controlled, an ARB may be added to an ACE inhibitor and other antihypertensive drug treatment. Careful monitoring should be used if combining an ACE inhibitor and an ARB due to potential adverse effects such as hypotension, hyperkalemia and worsening renal function. Additional therapies may also include dihydropyridine CCBs. | CHEP [2]    |
| An ACE inhibitor or ARB is recommended for most patients with hypertension and coronary artery disease.                                                                                                                                                                                                                                                                                                         | CHEP [2]    |
| In patients with coronary artery disease and deemed to be at high risk, when combination therapy is being used, choices should be individualized. The combination of an ACE inhibitor and a dihydropyridine CCB is preferable to an ACE inhibitor and a diuretic in selected patients.                                                                                                                          | CHEP [2]    |
| For patients with stable angina, $\beta$ -blockers are preferred as initial therapy. CCBs may also be used.                                                                                                                                                                                                                                                                                                     | CHEP [2]    |
| For patients with recent myocardial infarction, initial therapy should include both a $\beta$ -blocker and an ACE inhibitor. An ARB can be used if the patient is intolerant of an ACE inhibitor                                                                                                                                                                                                                | CHEP [2]    |
| <b>Overweight/Obesity</b>                                                                                                                                                                                                                                                                                                                                                                                       |             |
| Adults with class III overweight/obesity (BMI $\geq$ 40.0 kg/m <sup>2</sup> ) or class II overweight/obesity (BMI 35.0 to 39.9 kg/m <sup>2</sup> ) with other comorbidities may be considered for bariatric surgery when other lifestyle interventions are inadequate in achieving weight goals.                                                                                                                | Obesity [1] |
| Primary care health professionals are encouraged to create                                                                                                                                                                                                                                                                                                                                                      | Obesity [1] |

|                                                                                                                                                                                                                                                                                    |             |
|------------------------------------------------------------------------------------------------------------------------------------------------------------------------------------------------------------------------------------------------------------------------------------|-------------|
| a nonjudgmental atmosphere when discussing weight management.                                                                                                                                                                                                                      |             |
| Health care professionals are encouraged to consider the barriers people might have concerning overweight/obesity and its management.                                                                                                                                              | Obesity [1] |
| *Each table is grouped into recommendations for all adults and for adults with particular comorbidities. The recommendations in the diagnostic strategies and pharmacological or procedural therapy tables are directed for adults with comorbidities, rather than for all adults. |             |

\* New or updated recommendation for 2014

Reference List

- 1 Lau DC, Douketis JD, Morrison KM, Hramiak IM, Sharma AM, Ur E: 2006 Canadian clinical practice guidelines on the management and prevention of obesity in adults and children [summary]. *CMAJ* 2007;176:S1-13.
- 2 Dasgupta K, Quinn RR, Zarnke KB, Rabi DM, Ravani P, Daskalopoulou SS, Rabkin SW, Trudeau L, Feldman RD, Cloutier L, Prebtani A, Herman RJ, Bacon SL, Gilbert RE, Ruzicka M, McKay DW, Campbell TS, Grover S, Honos G, Schiffrin EL, Bolli P, Wilson TW, Lindsay P, Hill MD, Coutts SB, Gubitza G, Gelfer M, Vallee M, Prasad GV, Lebel M, McLean D, Arnold JM, Moe GW, Howlett JG, Boulanger JM, Larochelle P, Leiter LA, Jones C, Ogilvie RI, Woo V, Kaczorowski J, Burns KD, Petrella RJ, Hiremath S, Milot A, Stone JA, Drouin D, Lavoie KL, Lamarre-Cliche M, Tremblay G, Hamet P, Fodor G, Carruthers SG, Pylypchuk GB, Burgess E, Lewanczuk R, Dresser GK, Penner SB, Hegele RA, McFarlane PA, Khara M, Pipe A, Oh P, Selby P, Sharma M, Reid DJ, Tobe SW, Padwal RS, Poirier L: The 2014 Canadian Hypertension Education Program Recommendations for Blood Pressure Measurement, Diagnosis, Assessment of Risk, Prevention, and Treatment of Hypertension. *Can J Cardiol* 2014;30:485-501.
- 3 Tremblay MS, Warburton DE, Janssen I, Paterson DH, Latimer AE, Rhodes RE, Kho ME, Hicks A, LeBlanc AG, Zehr L: New Canadian physical activity guidelines. *Applied Physiology, Nutrition, and Metabolism* 2011;36:36-46.
- 4 Stone JA, Arthur HM, Suskin N: Canadian Guidelines for Cardiac Rehabilitation and Cardiovascular Disease. Prevention: Translating Knowledge into Action; Winnipeg, MB, Canadian Association of Cardiac Rehabilitation, 2009.
- 5 Yu-Poth S, Zhao G, Etherton T, Naglak M, Jonnalagadda S, Kris-Etherton PM: Effects of the National Cholesterol Education Program's Step I and Step II dietary intervention programs on cardiovascular disease risk

- factors: a meta-analysis. *The American Journal of Clinical Nutrition* 1999;69:632-646.
- 6 Anderson TJ, Gregoire J, Hegele RA, Couture P, Mancini GB, McPherson R, Francis GA, Poirier P, Lau DC, Grover S, Genest J, Jr., Carpentier AC, Dufour R, Gupta M, Ward R, Leiter LA, Lonn E, Ng DS, Pearson GJ, Yates GM, Stone JA, Ur E: 2012 update of the Canadian Cardiovascular Society guidelines for the diagnosis and treatment of dyslipidemia for the prevention of cardiovascular disease in the adult. *Can J Cardiol* 2013;29:151-167.
  - 7 Ellis S, Speeoff T I, Dittus R: Diabetes patient education: a meta-analysis and meta-regression. *Patient Education and Counselling* 2004;52:97-105.
  - 8 Minet L, Moller S, LV: Mediating the effect of self-care management intervention in type 2 diabetes: a meta-analysis of 47 randomized controlled trials. *Patient Education and Counselling* 2010;29-41.
  - 9 Norris SL, Engelgau MM, Venkat Narayan KM: Effectiveness of Self-Management Training in Type 2 Diabetes: A systematic review of randomized controlled trials. *Diabetes Care* 2001;24:561-587.
  - 10 Jones H, Berard LD, MacNeill G, Whitham D, Yu C: Self-Management Education; 2013, p S26-S30.
  - 11 Ekoe JM, Punthakee Z, Ransom T, Prebtani APH, Goldenberg R: Screening for Type 1 and Type 2 Diabetes; 2013, p S12-S15.
  - 12 Gladman DD, Ang M, Su L, Tom BD, Schentag CT, Farewell CT: Cardiovascular morbidity in psoriatic arthritis. *Annals of Rheumatic Diseases* 2009;68:1131-1135.
  - 13 Han C, Robinson D Jr, Hackett M, Paramore L, Fraeman K, Bala M: Cardiovascular disease and risk factors in patients with rheumatoid arthritis, psoriatic arthritis and ankylosing spondylitis. *Journal of Rheumatology* 2006;33:2167-2172.
  - 14 Peters MJ, Van Halm VP, Voskuyl AE: Does rheumatoid arthritis equal diabetes mellitus as an independent risk factor for cardiovascular disease? A prospective study. *Arthritis & Rheumatology* 2009;61:1571-1579.
  - 15 Roifman I, Beck PL, Anderson TJ, Eisenberg MJ, Genest J: Chronic Inflammatory Diseases and Cardiovascular Risk: A Systematic Review. *Canadian Journal of Cardiology* 2011;27:174-182.

- 16 Sidney S, Sorel M, Quesenberry C.P.Jr, DeLuise C, Lanes S, Eisner M.D: COPD and incident cardiovascular disease hospitalizations and mortality: Kaiser permanente medical care program. *Chest* 2005;128:2068-2075.
- 17 Ward MM: Premature morbidity from cardiovascular and cerebrovascular diseases in women with systemic lupus erythematosus. *Arthritis & Rheumatology* 1999;42:338-346.
- 18 Lindsay P, Bayley M, McDonald A, Graham ID, Warner G, Phillips S: Toward a more effective approach to stroke: Canadian Best Practice Recommendations for Stroke Care. *Can Med Assoc J* 2008;178:1418-1425.
- 19 Poirier P, Dufour R, Carpentier A, Larose E: Screening for the Presence of Coronary Artery Disease; 2013, p S105-S109.
- 20 Goldenberg R, Punthakee Z: Definition, classification and diagnosis of diabetes, prediabetes and metabolic syndrome: Canadian Diabetes Association Clinical Practice Guidelines Expert Committee. *Can J Diabetes* 2013;37 Suppl 1:S8-S11.
- 21 Armstrong DWJ, Brouillard D, Matangi MF: The Effect of the Change in the Framingham Risk Score Calculator Between the 2006 and 2009 Canadian Lipid Guidelines. *Canadian Journal of Cardiology* 2011;27:167-170.
- 22 D'Agostino RB, Vasan RS, Pencina MJ, Wolf PA, Cobain M, Massaro JM, Kannel WB: General Cardiovascular Risk Profile for Use in Primary Care: The Framingham Heart Study. *Circulation* 2008;117:743-753.
- 23 Ford ES, Giles WH, Mokdad AH: The distribution of 10-Year risk for coronary heart disease among U.S. adults: Findings from the National Health and Nutrition Examination Survey III. *Journal of the American College of Cardiology* 2004;43:1791-1796.
- 24 Grover SA, Gray-Donald K, Joseph L, Abrahamowicz M, Coupal L: Life expectancy following dietary modification or smoking cessation. Estimating the benefits of a prudent lifestyle. *Archives of Internal Medicine* 1995;154:1697-16704.
- 25 Grover SA, Lowensteyn I, Joseph L, Kaouache M, Marchand S, Coupal L, Boudreau G: Discussing coronary risk with patients to improve blood pressure treatment: secondary results from the CHECK-UP study. *J Gen Intern Med* 2009;24:33-39.
- 26 Grover SA, Lowensteyn I, Joseph L, Kaouache M, Marchand S, Coupal L, Boudreau G, for the Cardiovascular Health Evaluation to Improve Compliance and Knowledge Among Uninformed Patients (CHECK-UP) Study Group: Patient Knowledge of Coronary Risk Profile Improves the Effectiveness of

- Dyslipidemia Therapy: The CHECK-UP Study: A Randomized Controlled Trial. *Archives of Internal Medicine* 2007;167:2296-2303.
- 27 Lloyd-Jones DM NBDRSLDMJWTWPOCJ: Parental Cardiovascular Disease as a Risk Factor for Cardiovascular Disease in Middle-aged Adults: A Prospective Study and Offspring. *The Journal of American Medical Association* 2004;291:2204-2211.
- 28 Prospective Studies Collaboration: Blood cholesterol and vascular mortality by age, sex, and blood pressure: a meta-analysis of individual data from 61 prospective studies with 55 000 vascular deaths. *The Lancet* 2001;370:1829-1839.
- 29 ACCORD Study Group GHEMea: Effects of Combination Lipid Therapy in Type 2 Diabetes Mellitus. *NEJM* 2010;362:1563-1574.
- 30 AIM-HIGH Investigators BWPJea: Niacin in Patients with Low HDL Cholesterol Levels Receiving Intensive Statin Therapy. *NEJM* 2011;365:2255-2267.
- 31 Baigent C, Blackwell L, Emberson J, Holland LE, Reith C, Bhala N, Peto R, Barnes EH, Keech A, Simes J, Collins R: Efficacy and safety of more intensive lowering of LDL cholesterol: a meta-analysis of data from 170,000 participants in 26 randomised trials. *Lancet* 2010;376:1670-1681.
- 32 Dong-Chuan, G., Papke CL, He R, Milewicz DM: Pathogenesis of Thoracic and Abdominal Aortic Aneurysms. *Annals of the New York Academy of Sciences* 2006;1085:339-352.
- 33 Sever PS, Dahl Bjorn, Poulter NR, Wedel H, Beevers G, Caulfield M, Collins R, Kjeldsen SE, Kristinsson A, McInnes GT, Mehlsen J, Nieminen M, O'Brien E, Ostergren J: Prevention of coronary and stroke events with atorvastatin in hypertensive patients who have average or lower-than-average cholesterol concentrations, in the Anglo-Scandinavian Cardiac Outcomes Trial Lipid Lowering Arm (ASCOT-LLA): a multicentre randomised controlled trial. *The Lancet* 2003;361:1149-1158.
- 34 Tonelli M, Muntner P, Lloyd A, Manns BJ, Klarenbach S, Pannu N, James MT, Hemmelgarn BR: Risk of coronary events in people with chronic kidney disease compared with those with diabetes: a population-level cohort study. *The Lancet* 2012.
- 35 WRITING GROUP, Hiratzka LF, Bakris GL, Beckman JA, Bersin RM, Carr VF, Casey DE, Eagle KA, Hermann LK, Isselbacher EM, Kazerooni EA, Kouchoukos NT, Lytle BW, MILEWICZ DM, Reich DL, Sen S, Shinn JA, Svensson LG, Williams DM: 2010 ACCF/AHA/AATS/ACR/ASA/SCA/SCAI/SIR/STS/SVM Guidelines for the

- Diagnosis and Management of Patients With Thoracic Aortic Disease: A Report of the American College of Cardiology Foundation/American Heart Association Task Force on Practice Guidelines, American Association for Thoracic Surgery, American College of Radiology, American Stroke Association, Society of Cardiovascular Anesthesiologists, Society for Cardiovascular Angiography and Interventions, Society of Interventional Radiology, Society of Thoracic Surgeons, and Society for Vascular Medicine. *Circulation* 2010;121:e266-e369.
- 36 Baigent C, Keech A, Kearney PM, Blackwell L, Buck G, Pollicino C, Kirby A, Sourjina T, Peto R, Collins R, Simes R, Cholesterol Treatment Trialists' (CTT) Collaborators: Efficacy and safety of cholesterol-lowering treatment: prospective meta-analysis of data from 90,056 participants in 14 randomised trials of statins. *The Lancet* 2008;366:1267-1278.
- 37 Boekholdt SM, Arsenault BJ, Mora S: Association of LDL cholesterol, non-HDL cholesterol, and apolipoprotein B levels with risk of cardiovascular events among patients treated with statins: a meta-analysis. *JAMA* 2012;307:1309.
- 38 Cannon CP, Braunwald E, McCabe CH, Rader DJ, Rouleau JL, Belder R, Joyal SV, Hill KA, Pfeffer MA, Skene AM: Intensive versus Moderate Lipid Lowering with Statins after Acute Coronary Syndromes. *NEJM* 2004;350:1495-1504.
- 39 Downs JR, Clearfield M, Weis S.: Primary prevention of acute coronary events with lovastatin in men and women with average cholesterol levels: results of AFCAPS/TexCAPS. Air Force/Texas coronary atherosclerosis prevention study. *JAMA* 1998;279:1622.
- 40 Kathiresan S, Otvos JD, Sullivan LM, Keyes MJ, Schaefer EJ, Wilson PWF, D'Agostino RB, Vasan RS, Robins SJ: Increased Small Low-Density Lipoprotein Particle Number: A Prominent Feature of the Metabolic Syndrome in the Framingham Heart Study. *Circulation* 2006;113:20-29.
- 41 LaRosa JC, Grundy SM, Waters DD, Shear C, Barter P, Fruchart JC, Gotto AM, Greten H, Kastelein JJP, Shepherd J, Wenger NK: Intensive Lipid Lowering with Atorvastatin in Patients with Stable Coronary Disease. *NEJM* 2005;352:1425-1435.
- 42 Pedersen TR, FO, Kastelein JJ.: High-Dose Atorvastatin vs Usual-Dose Simvastatin for Secondary Prevention After Myocardial Infarction The IDEAL Study: A Randomized Controlled Trial. *JAMA* 2005;294:2445.
- 43 Ridker PM, Danielson E, Fonseca FAH, Genest J, Gotto AM, Kastelein JJP, Koenig W, Libby P, Lorenzatti AJ, MacFadyen JG, Nordestgaard BG, Shepherd J, Willerson JT, Glynn RJ: Rosuvastatin to Prevent Vascular Events

- in Men and Women with Elevated C-Reactive Protein. *NEJM* 2008;359:2195-2207.
- 44 Shepherd J, Cobbe SM, Ford I, Isles CG, Lorimer AR, Macfarlane PW, McKillop JH, Packard CJ: Prevention of Coronary Heart Disease with Pravastatin in Men with Hypercholesterolemia. *NEJM* 1995;333:1301-1308.
- 45 Sniderman AD, Williams K, Contois JH, Monroe HM, McQueen MJ, de Graaf J, Furberg CD: A Meta-Analysis of Low-Density Lipoprotein Cholesterol, Non-High-Density Lipoprotein Cholesterol, and Apolipoprotein B as Markers of Cardiovascular Risk. *Circ Cardiovasc Qual Outcomes* 2011;4:337-345.
- 46 Study of the Effectiveness of Additional Reductions in Cholesterol and Homocysteine (SEARCH) Collaborative Group: Intensive lowering of LDL cholesterol with 80 mg versus 20 mg simvastatin daily in 12 064 survivors of myocardial infarction: a double-blind randomised trial. *The Lancet* 2013;376:1658-1669.
- 47 Wiviott SD, de Lemos JA, Cannon CP, Blazing M, Murphy SA, McCabe CH, Califf R, Braunwald E: A Tale of Two Trials: A Comparison of the Post-Acute Coronary Syndrome Lipid-Lowering Trials A to Z and PROVE IT I 22. *Circulation* 2006;113:1406-1414.
- 48 Stone JA, Fitchett D, Grover S, Lewanczuk R, Lin P: Vascular Protection in People with Diabetes: Canadian Diabetes Association Clinical Practice Guidelines Expert Committee. *Canadian Journal of Diabetes* 2013;37:S100-S104.
- 49 Holman RR, Paul SK, Bethel MA, Matthews DR, Neil HA: 10-Year Follow-up of Intensive Glucose Control in Type 2 Diabetes. *NEJM* 2008;359:1577-1589.
- 50 Nathan DM, Cleary PA, Backlund JY: Intensive Diabetes Treatment and Cardiovascular Disease in Patients with Type 1 Diabetes. *NEJM* 2005;353:2643-2653.
- 51 Imran SA, Rabasa-Lhoret R, Ross S: Targets for Glycemic Control: Canadian Diabetes Association Clinical Practice Guidelines Expert Committee. *Canadian Journal of Diabetes* 2013;37:S31-S34.
- 52 The ACCORD Study Group and ACCORD Eye Study Group: Effects of Medical Therapies on Retinopathy Progression in Type 2 Diabetes. *NEJM* 2010;363:233-244.
- 53 The ADVANCE Collaborative Group.: Intensive Blood Glucose Control and Vascular Outcomes in Patients with Type 2 Diabetes. *NEJM* 2008;358:2560-2572.

- 54 Look AHEAD Research Group<sup>1</sup> WR: Long-term Effects of a Lifestyle Intervention on Weight and Cardiovascular Risk Factors in Individuals With Type 2 Diabetes Mellitus Four-Year Results of the Look AHEAD Trial. *Archives of Internal Medicine* 2010;170:1566-1575.
- 55 Dworatzek PD, Arcudi K, Gougeon R, Husein N, Sievenpiper JL, Williams SL: Nutrition Therapy: Canadian Diabetes Association Clinical Practice Guidelines Expert Committee. *Canadian Journal of Diabetes* 2013;37:S45-S55.
- 56 Gilbert RE, Rabi D, Larochelle P, Leiter LA, Jones C, Ogilvie R, Tobe S, Khan N, Poirier L, Woo V: Treatment of hypertension. *Can J Diabetes* 2013;37 Suppl 1:S117-S118.
- 57 Beckett NS, Peters R, Fletcher AE, Staessen JA, Liu L, Dumitrascu D, Stoyanovsky V, Antikainen RL, Nikitin Y, Anderson C, Belhani A, Forette F, Rajkumar C, Thijs L, Banya W, Bulpitt CJ, the HYVET Study Group: Treatment of Hypertension in Patients 80 Years of Age or Older. *N Engl J Med* 2008;NEJMoa0801369.
- 58 Howlett JG, MacFadyen JC: Treatment of Diabetes in People with Heart Failure: Canadian Diabetes Association Clinical Practice Guidelines Expert Committee. *Canadian Journal of Diabetes* 2013;37:S126-S128.
- 59 Colhoun HM, Betteridge DJ, Durrington PN, Hitman GA, Neil HA, Livingstone SJ, Thomason MJ, Mackness MI, Charlton-Menys V, Fuller JH: Primary prevention of cardiovascular disease with atorvastatin in type 2 diabetes in the Collaborative Atorvastatin Diabetes Study (CARDS): multicentre randomised placebo-controlled trial. *Lancet* 2004;364:685-696.
- 60 Collins R, Armitage J, Parish S, Sleight P, Peto R: MRC/BHF Heart Protection Study of cholesterol-lowering with simvastatin in 5963 people with diabetes: a randomised placebo-controlled trial. *Lancet* 2003;361:2005-2016.
- 61 Grover SA, Coupal L, Zowall H, Alexander CM, Weiss TW, Gomes DR: How cost-effective is the treatment of dyslipidemia in patients with diabetes but without cardiovascular disease?[see comment]. *Diabetes Care* 2001;24:45-50.
